# Supplementary figures and images for: Autophagy Facilitates Salmonella Replication in HeLa Cells
Source: PubMed Central journal article supplement — mBio. 2014 Mar 11;5(2):e00865-14. doi: 10.1128/mBio.00865-14 (PMC3952155; doi:10.1128/mbio.00865-14), 2014-03-11

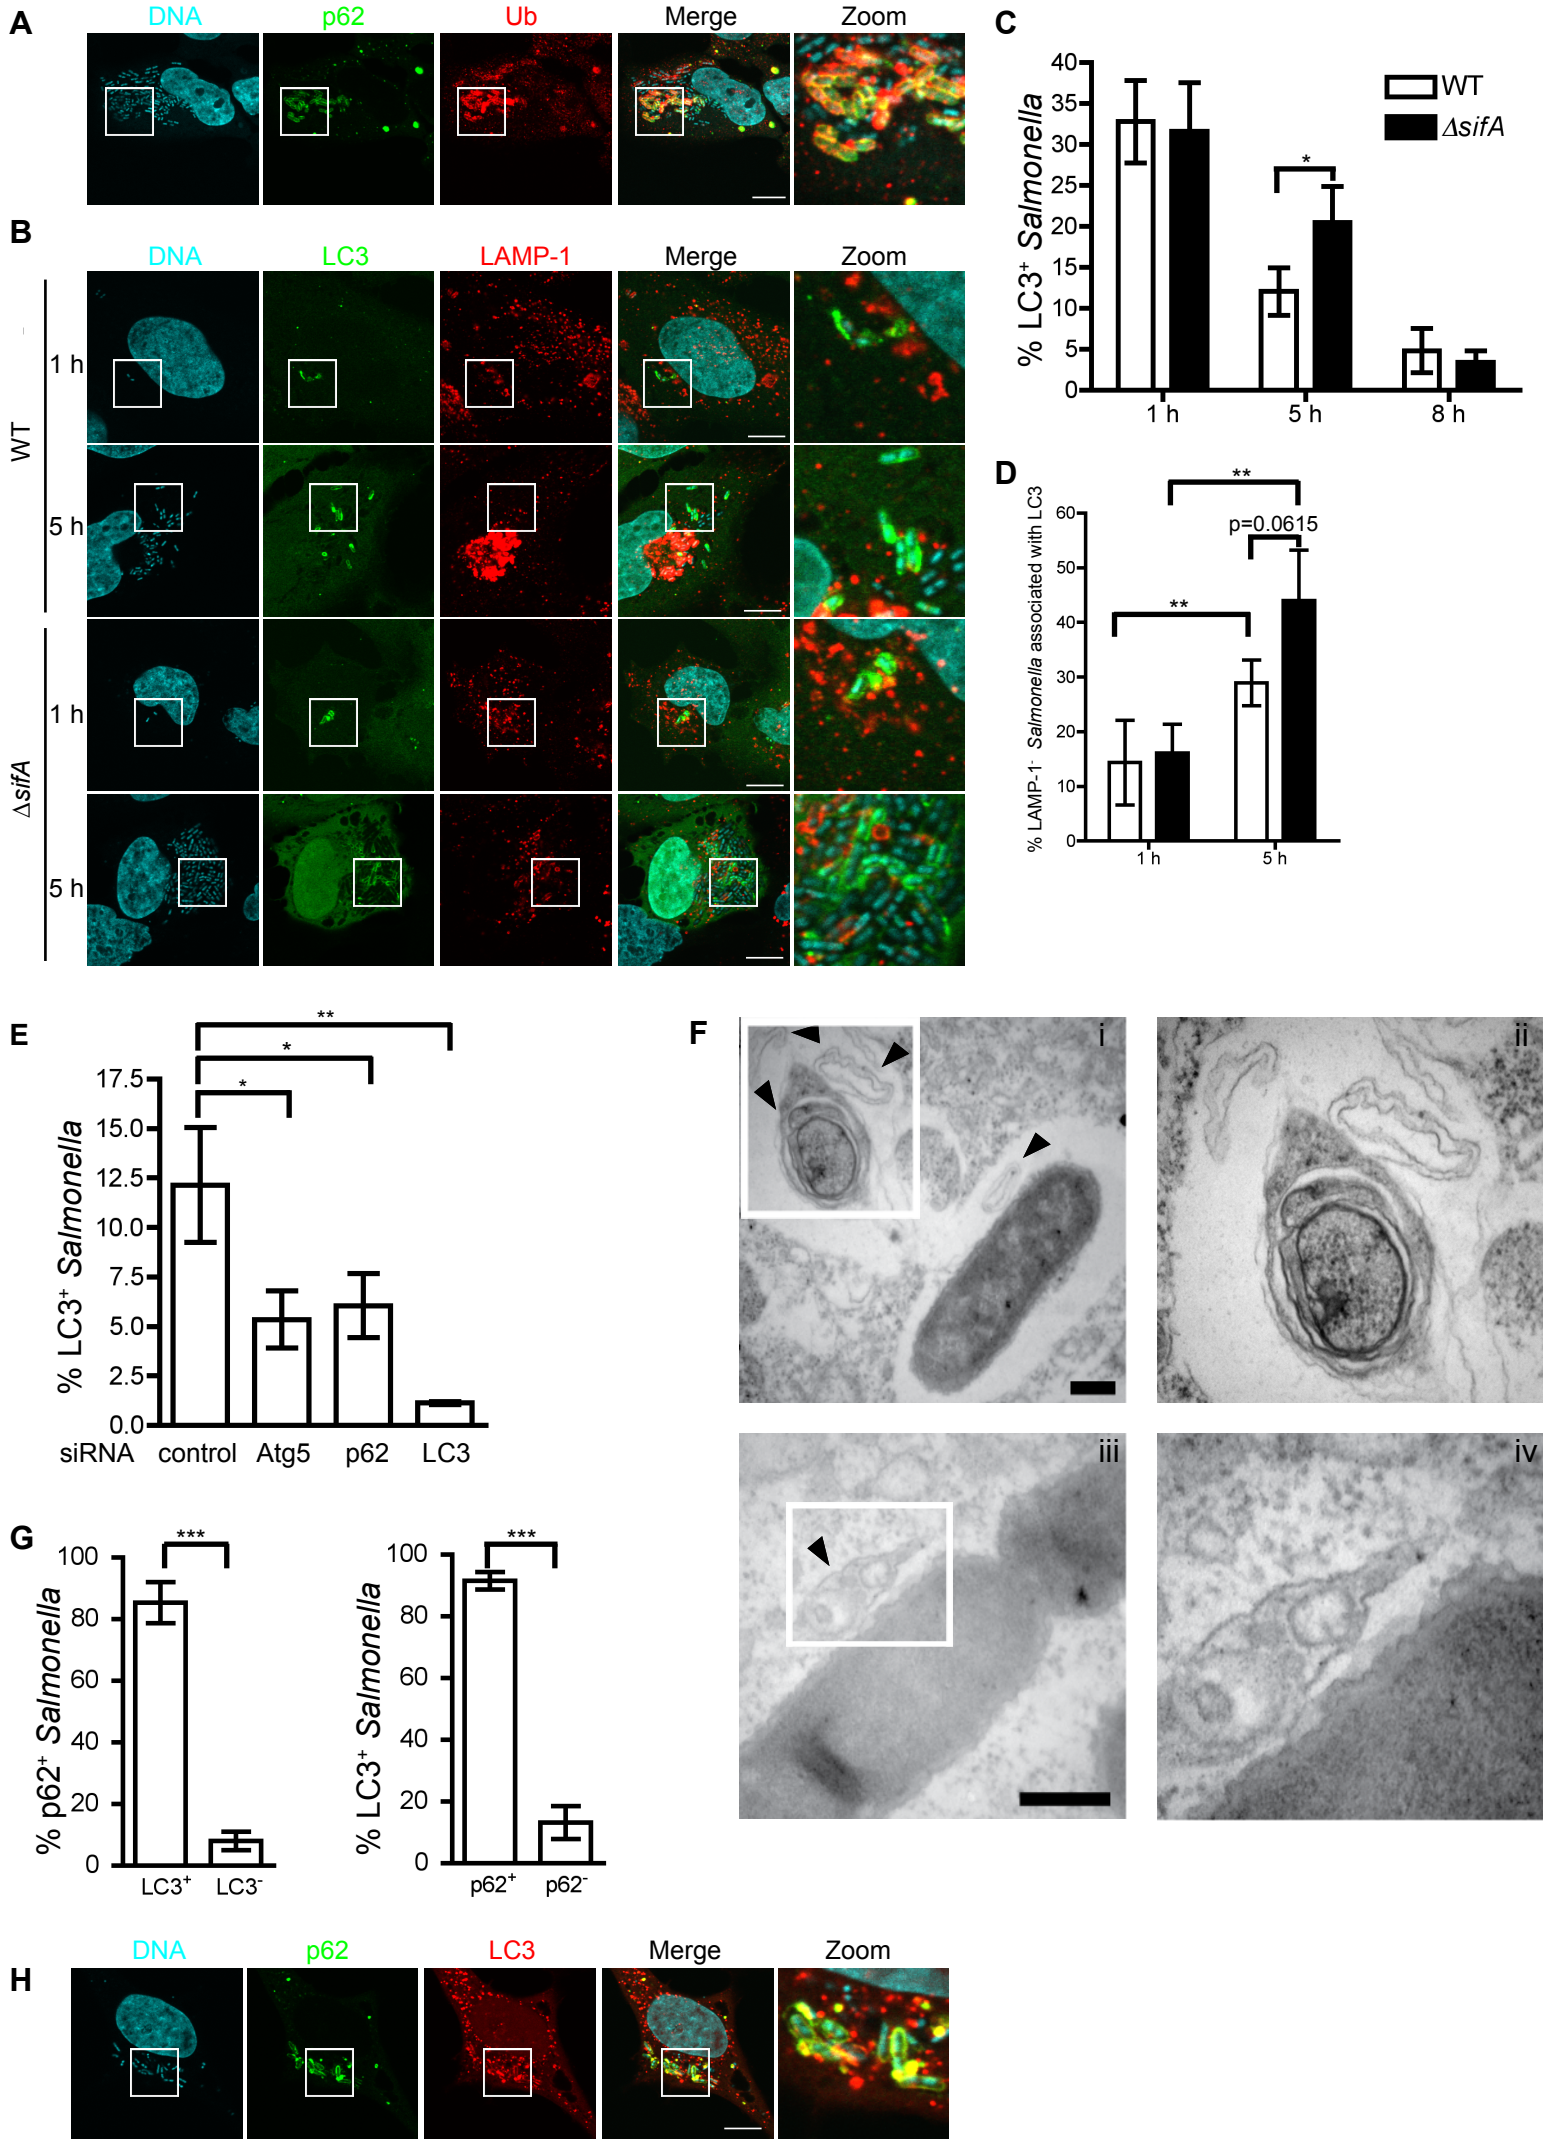

**Figure S1**

Supplement: mbo001141765sf01.pdf [file mbo001141765sf01.pdf]

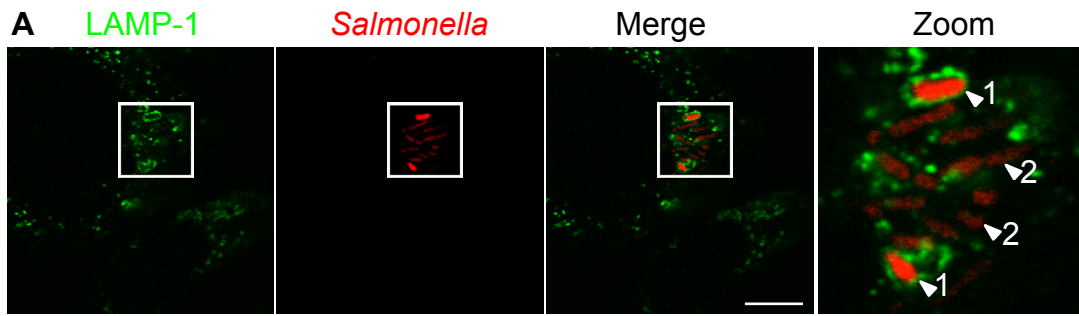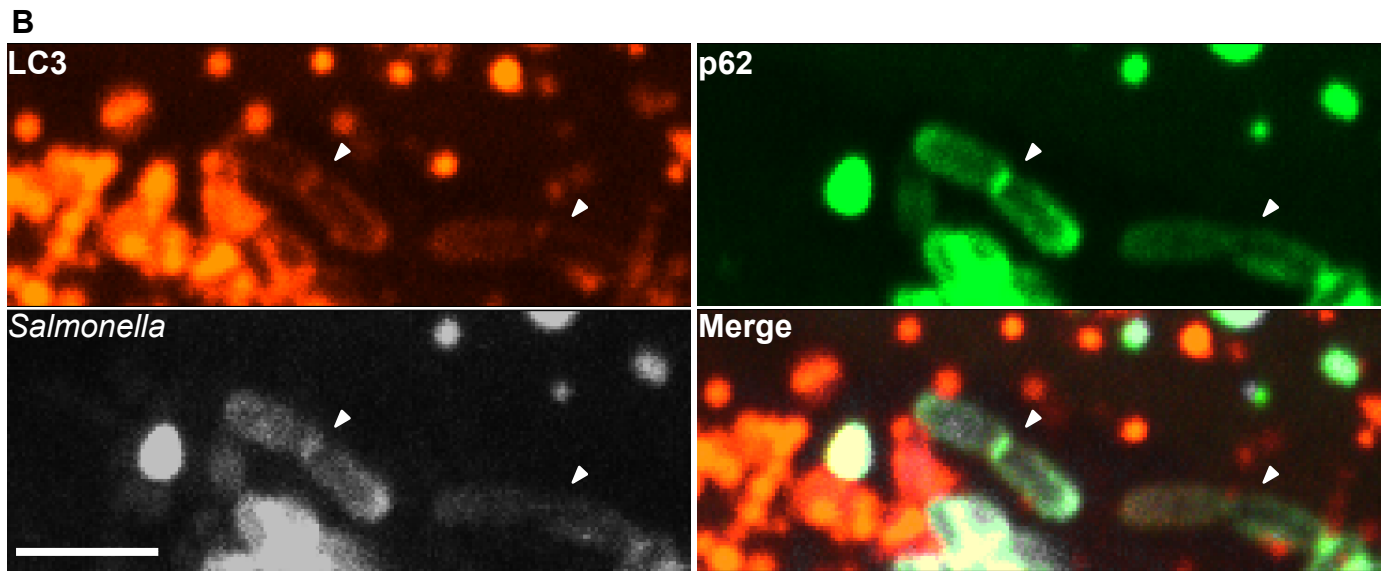

**Figure S2**

Supplement: mbo001141765sf02.pdf [file mbo001141765sf02.pdf]

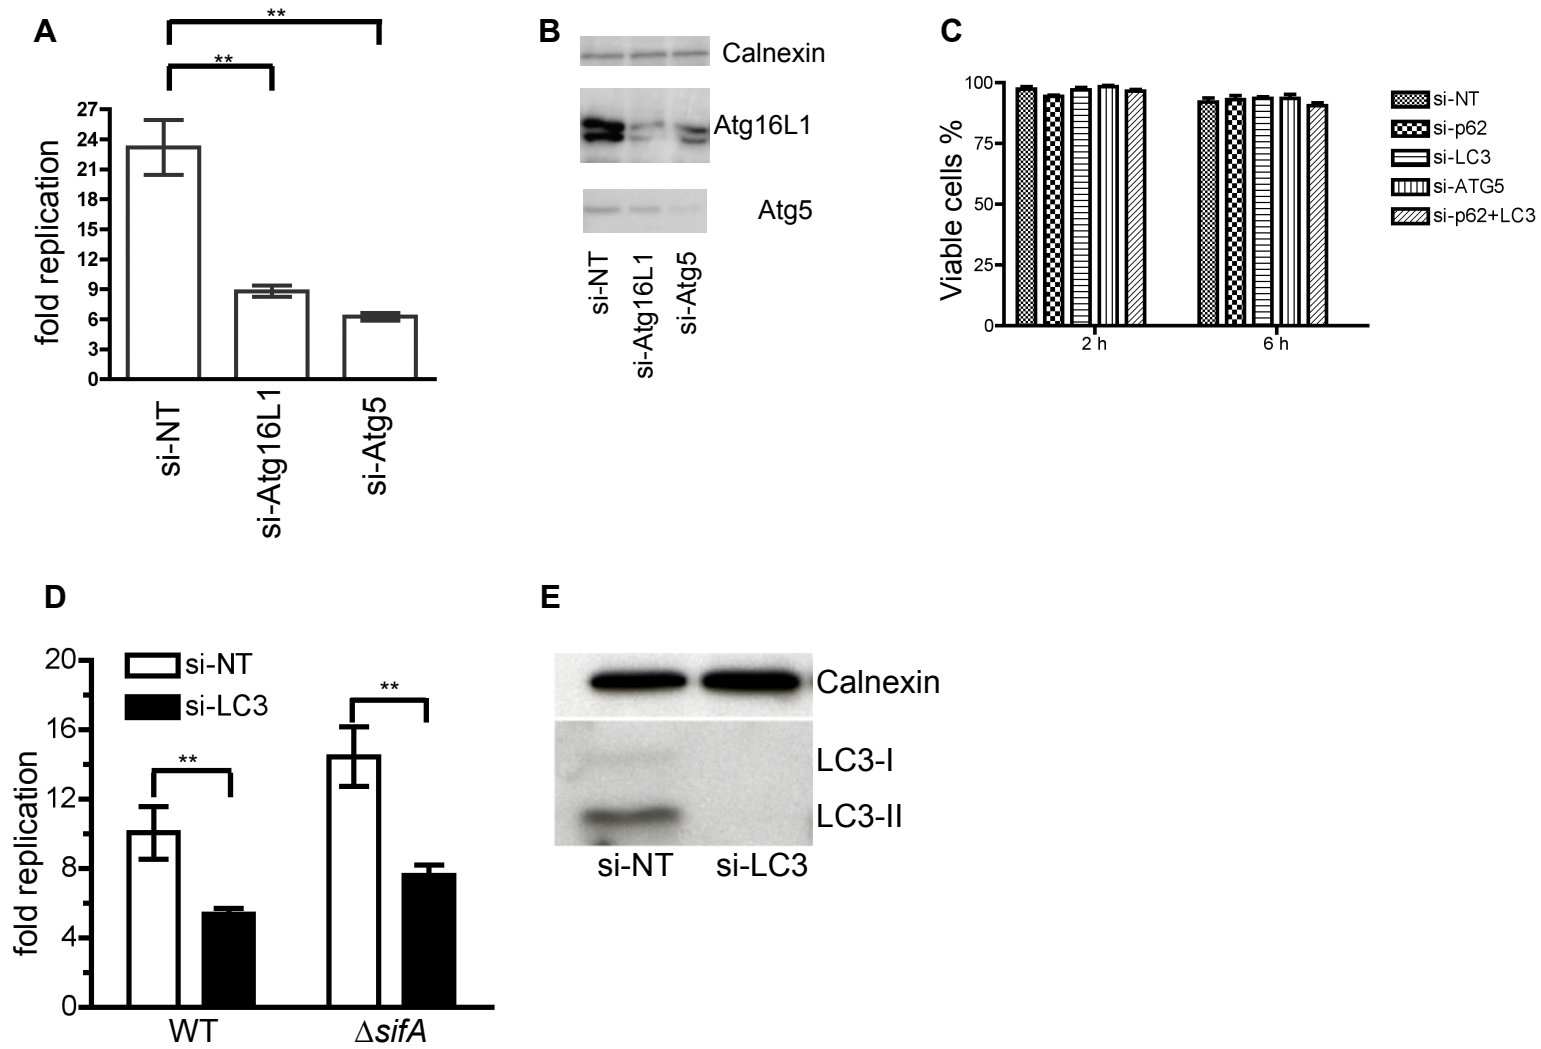

**Figure S3**

Supplement: mbo001141765sf03.pdf [file mbo001141765sf03.pdf]

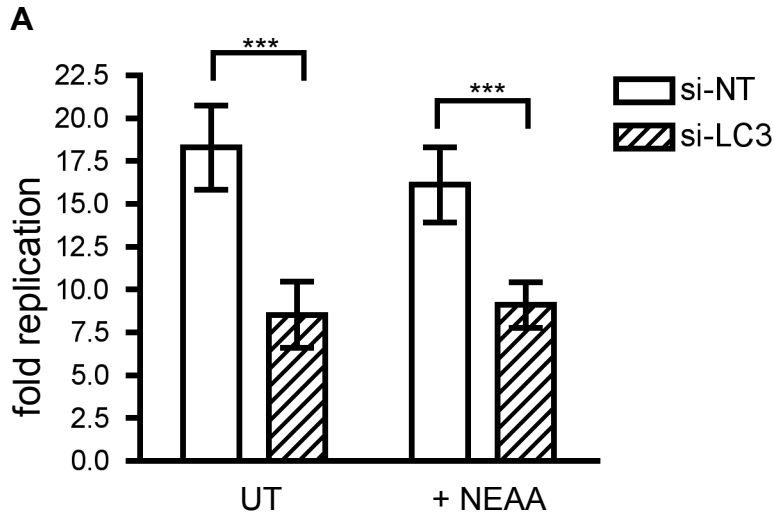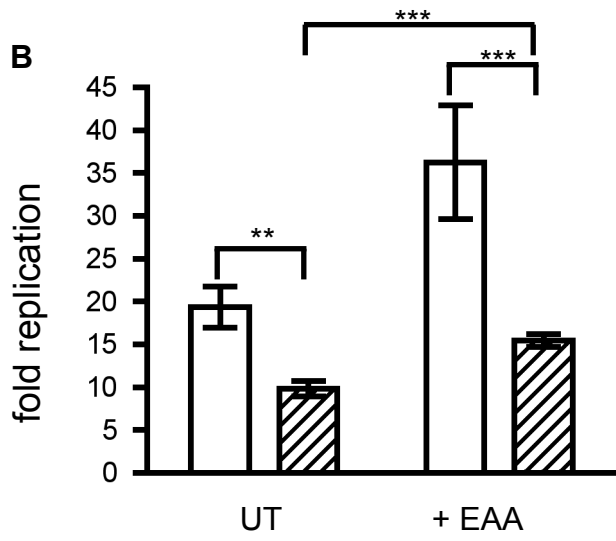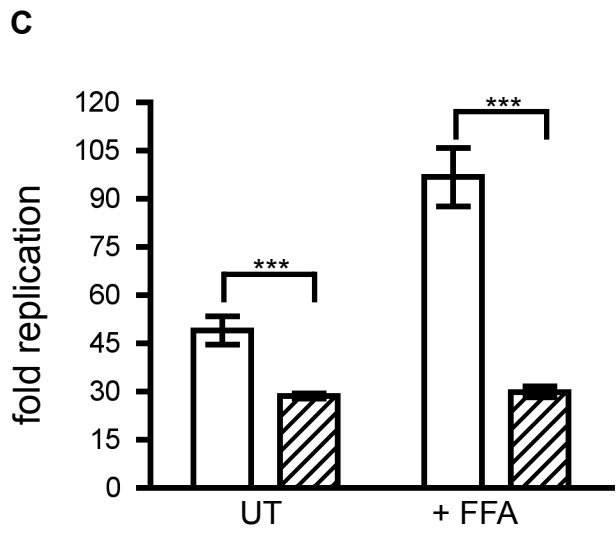

**Figure S4**

Supplement: mbo001141765sf04.pdf [file mbo001141765sf04.pdf]
